# Supplementary material
Source: PubMed Central journal article supplement (PMC3347365)
Supplement: supp_86.9.4906_TableS1_FigS1.pdf [file supp_86.9.4906_TableS1_FigS1.pdf]

## **Supplemental Data**

### **Efficient Nef-Mediated Down-modulation of TCR-CD3 and CD28 is Associated with High CD4+ T Cell Counts in Viremic HIV-2 Infection**

Mohammad Khalid, Hangxing Yu, Daniel Sauter, Shariq Usmani, Jan Schmokel, Jerome Feldman, Rob A. Gruters, Marchina E. van der Ende, Matthias Geyer, Albert D. Osterhaus, Sarah Rowland-Jones, Frank Kirchhoff

**Table S1.** Samples of HIV-2-infected individuals examined

| Subject             | Sex  | Age <sup>a</sup> | CD4 <sup>b</sup> | PVL <sup>c</sup> | Group <sup>d</sup> | R5/X4 <sup>e</sup> | Group | References |
|---------------------|------|------------------|------------------|------------------|--------------------|--------------------|-------|------------|
| N2A4                | Fem  | 83               | n.k.             | bql              | non-viremic        | n.k.               | A     | [19,25]    |
| N2A7                | Fem  | 72               | n.k.             | bql              | non-viremic        | n.k.               | A     | [19,25]    |
| N2A8                | Fem  | 67               | n.k.             | bql              | non-viremic        | n.k.               | A     | [19,25]    |
| N2A9 <sup>f</sup>   | Fem  | 71               | 685              | bql              | non-viremic        | n.k.               | A     | [19,25]    |
| N2B7                | Fem  | 38               | n.k.             | bql              | non-viremic        | n.k.               | A     | [19,25]    |
| N2B9                | Fem  | 33               | 400              | bql              | non-viremic        | n.k.               | A     | [19,25]    |
| N2C6                | Fem  | 41               | 805              | bql              | non-viremic        | n.k.               | A     | [19,25]    |
| N2D7                | Male | 60               | n.k.             | bql              | non-viremic        | n.k.               | A     | [19,25]    |
| N2D8                | Fem  | 49               | 905              | bql              | non-viremic        | n.k.               | A     | [19,25]    |
| N2E10               | Fem  | 60               | 1240             | bql              | non-viremic        | n.k.               | A     | [19,25]    |
| N2F8                | Fem  | 79               | 540              | bql              | non-viremic        | n.k.               | A     | [19,25]    |
| RH2-3 <sup>f</sup>  | n.k. | n.k.             | 770              | bql              | non-viremic        | R5                 | A     | [26,27]    |
| RH2-8               | n.k. | n.k.             | 900              | bql              | non-viremic        | R5                 | B     | [26,27]    |
| RH2-13 <sup>f</sup> | n.k. | n.k.             | 900              | bql              | non-viremic        | R5                 | A     | [26,27]    |
| RH2-14 <sup>f</sup> | n.k. | n.k.             | 550              | bql              | non-viremic        | R5                 | A     | [26,27]    |
| RH2-22 <sup>f</sup> | n.k. | n.k.             | 670              | bql              | non-viremic        | R5                 | B     | [26,27]    |
| P2A12               | Fem  | 83               | 615              | 24002            | viremic            | n.k.               | A     | [19,25]    |
| P2B5                | Fem  | 59               | 610              | 2247             | viremic            | n.k.               | A     | [19,25]    |
| P2C11               | Fem  | 63               | 460              | 7456             | viremic            | n.k.               | A     | [19,25]    |
| P2C12 <sup>f</sup>  | Male | 74               | 160              | 1350             | viremic            | n.k.               | A     | [19,25]    |
| P2C5                | Fem  | 59               | 170              | 2259             | viremic            | n.k.               | A     | [19,25]    |
| P2C9                | Fem  | 75               | 875              | 2298             | viremic            | n.k.               | A     | [19,25]    |
| P2E5                | Fem  | 70               | n.k.             | 1781             | viremic            | n.k.               | A     | [19,25]    |
| P2E6                | Male | 57               | 800              | 7260             | viremic            | n.k.               | A     | [19,25]    |
| P2E9 <sup>f</sup>   | Male | 36               | 450              | 4111             | viremic            | n.k.               | A     | [19,25]    |
| P2F10               | Fem  | 33               | 1075             | 19576            | viremic            | n.k.               | A     | [19,25]    |
| P2F12               | Fem  | 38               | 785              | 6792             | viremic            | n.k.               | A     | [19,25]    |
| P2F4                | Male | 43               | 560              | 1655             | viremic            | n.k.               | A     | [19,25]    |
| P2F5                | Male | 52               | 430              | 4366             | viremic            | n.k.               | A     | [19,25]    |
| P2F7 <sup>f</sup>   | Fem  | 74               | n.k.             | 10129            | viremic            | n.k.               | A     | [19,25]    |
| P2G8                | Fem  | 59               | 950              | 3212             | viremic            | n.k.               | A     | [19,25]    |
| RH2-1 <sup>f</sup>  | n.k. | n.k.             | 240              | >500             | viremic            | R5                 | A     | [26-29]    |
| RH2-5 <sup>f</sup>  | n.k. | n.k.             | 120              | 110000           | viremic            | R5                 | A     | [26,27]    |
| RH2-7 <sup>f</sup>  | n.k. | n.k.             | 10               | >500             | viremic            | R5                 | A     | [26,27]    |
| RH2-24              | n.k. | n.k.             | 70               | 23000            | viremic            | R5/X4              | A     | [26,27]    |
| RH2-26 <sup>f</sup> | n.k. | n.k.             | 10               | 330000           | viremic            | R5/X4              | B     | [26,27]    |
| PH2-1 <sup>g</sup>  | n.k. | n.k.             | 200              | >500             | viremic            | n.k.               | A     | [26,27]    |

<sup>a</sup>Age at the year of virus isolation. <sup>b</sup>Absolute CD4 T cell counts per  $\mu$ l blood. <sup>c</sup>Copies of plasma viral RNA per milliliter. <sup>d</sup>Grouped based on VLs. <sup>e</sup>R5/X4 co-receptor usage was determined as described [27]. <sup>f</sup>Two and <sup>g</sup>three viral clones were derived respectively. Abbreviations: Fem, female; n.k., not known; bql, below quantifiable limit.
